# Supplementary material
Source: MDPI journal article supplement (https://www.mdpi.com/2079-6412/13/10/1767)
Supplement: s1 [file s1 › coatings-2626492-supplementary.pdf]

## Supplementary Materials

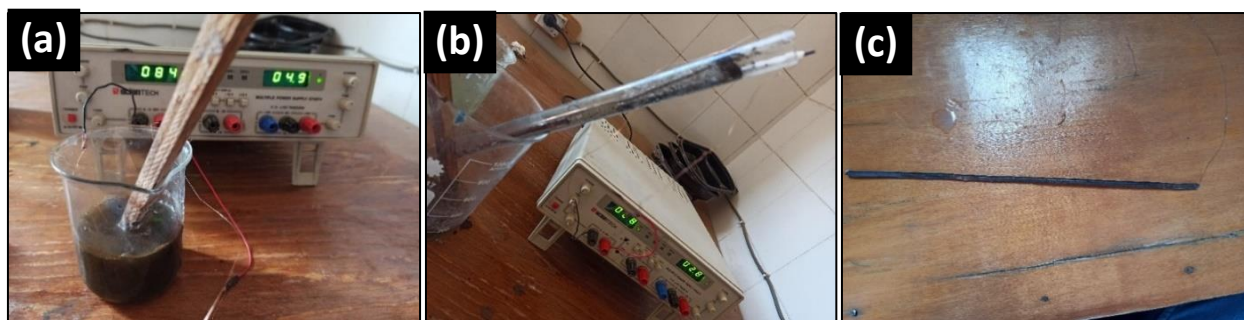

**Figure S1.** (a) electroplating of inner conductor, (b) electroplating of outer conductor, (c) result from electroplating.

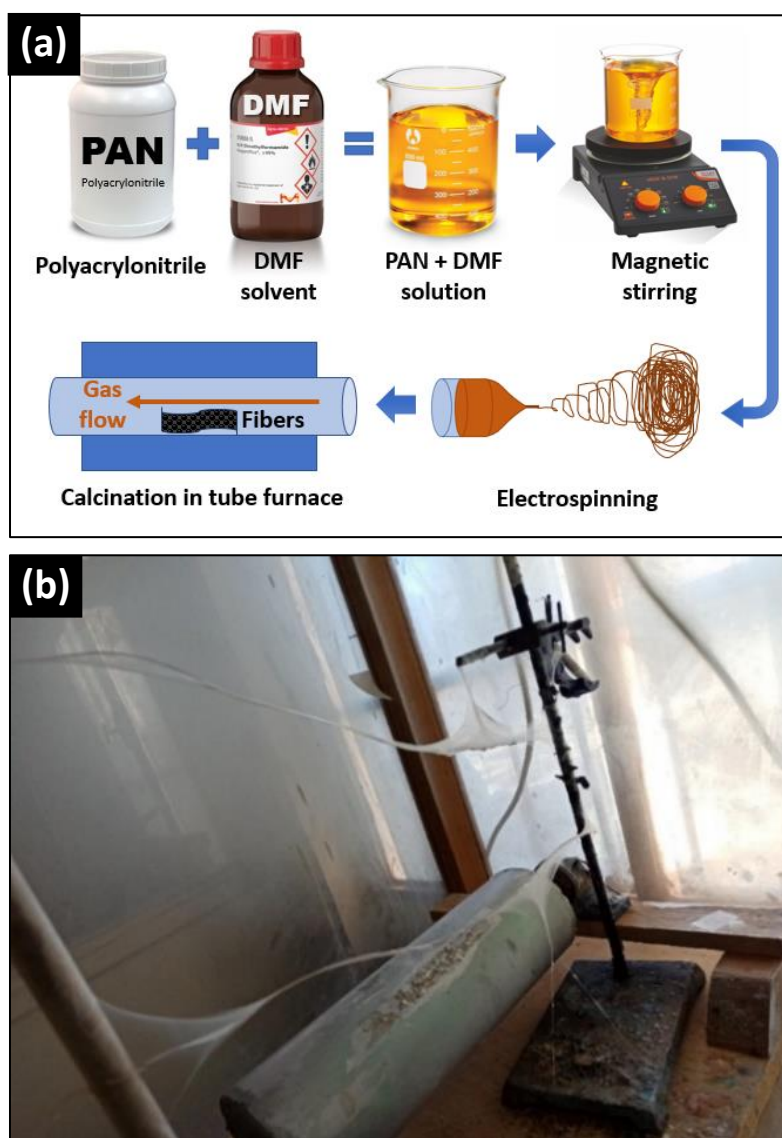

**Figure S2.** (a) a schematic for the electrospinning process. (b) PAN nanofibers on the inner and outer conductor.

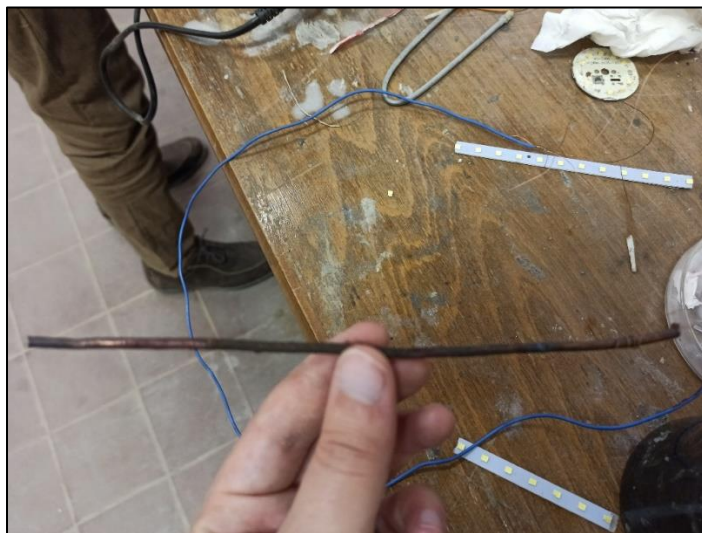

**Figure S3.** The result from calcination of the outer conductor.

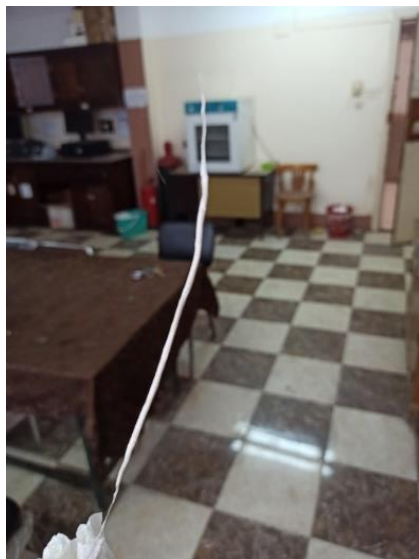

**Figure S4.** Electrospinning of the inner conductor to be inserted into the outer conductor.

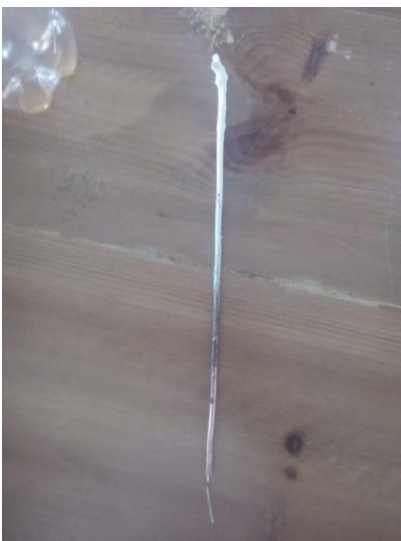

**Figure S5.** The final shape of the proposed antenna
